# Supplementary material for: Genome-Wide Transcriptional Profiling Reveals PHACTR1 as a Novel Molecular Target of Resveratrol in Endothelial Homeostasis
Source: MDPI journal article supplement (doi:10.3390/nu14214518), 2022-10-27
Supplement: s1 [file s1]

## Supplemental Materials

**Supplemental Table S1. Primer sequence.**

| Primers     | Sequences             |
|-------------|-----------------------|
| hKLF2-S     | GCCGTCCTTCTCCACTTTC   |
| hKLF2-AS    | GAAGTCCAGCACGCTGTT    |
| hEDN1-S     | AAGGCAACAGACCGTGAAA   |
| hEDN1-AS    | GTCTTCAGCCCTGAGTTCTTT |
| hPHACTR1-S  | GGAACTGGAACAGAGGAACAT |
| hPHACTR1-AS | TTGACTGAGCTTTCGGGTTAG |
| hGAPDH-S    | GATTCCACCCATGGCAAATTC |
| hGAPDH-AS   | CTGGAAGATGGTGATGGGATT |

**Supplemental Table S2. Antibodies and sources.**

| Antibody | Catlog# and Vendor       |
|----------|--------------------------|
| PHACTR1  | #ab229120, Abcam         |
| GAPDH    | #60004-1-Ig, Proteintech |
